# Supplementary material
Source: PubMed Central journal article supplement (PMC3250170)
Supplement: 1117531108_pnas.201117531SI.pdf [file 1117531108_pnas.201117531SI.pdf]

# Supporting Information

Walker et al. 10.1073/pnas.1117531108

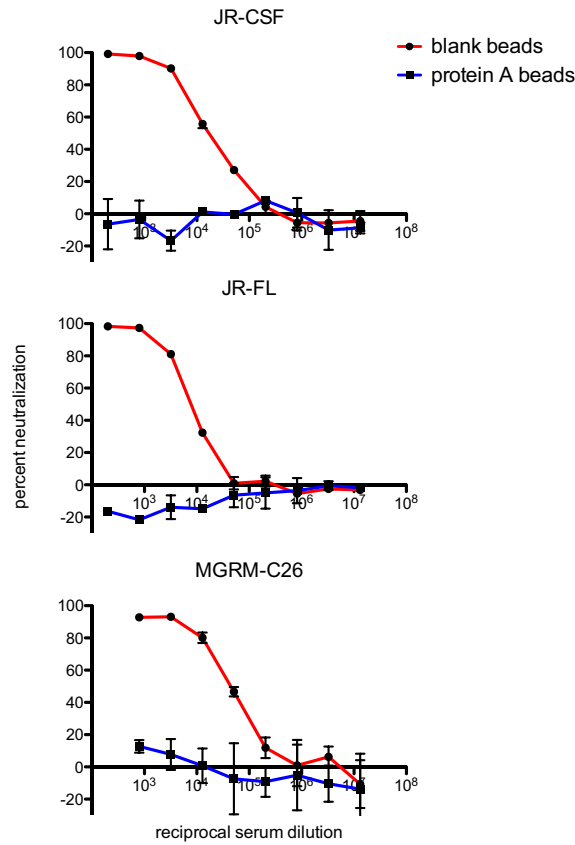

Fig. S1. The broad neutralizing activity in macaque CE8J plasma is mediated by IgG. Plasma was adsorbed with Protein A-Sepharose beads or blank control beads, and the depleted fractions were tested for neutralizing activity using a single round of replication pseudovirus assay.

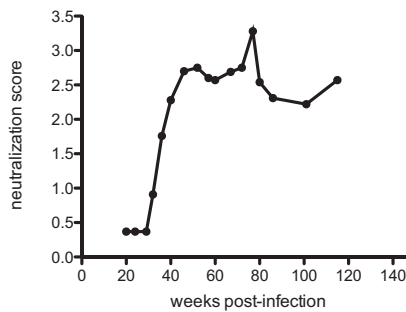

Fig. S2. Neutralization score of macaque CE8J plasma taken at serial time points. Neutralization scores were calculated as described previously (1). Data were plotted using Graphpad Prism<sup>®</sup> software.

1. Simek MD, et al. (2009) Human immunodeficiency virus type 1 elite neutralizers: Individuals with broad and potent neutralizing activity identified by using a high-throughput neutralization assay together with an analytical selection algorithm. *J Virol* 83:7337–7348.

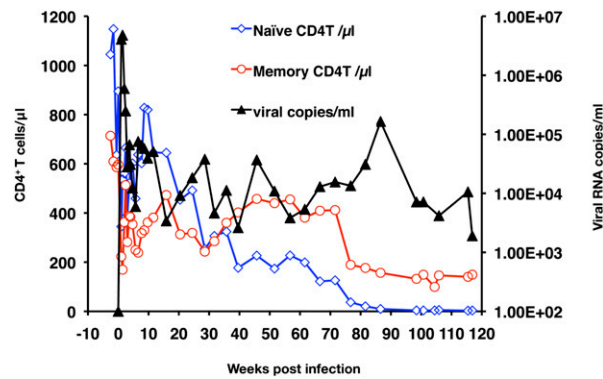

**Fig. S3.** Plasma virus loads and naïve and memory CD4+ T-cell numbers during the course of the infection of macaque CE8J. Plasma viral loads and absolute numbers of naïve and memory CD4+ T cells in macaque CE8J during 120 wk of SHIV<sub>AD8</sub> infection.

| JR-FL gp120 construct | % neutralization adsorbed on the indicated construct |         |     |          |
|-----------------------|------------------------------------------------------|---------|-----|----------|
|                       | JR-FL                                                | 92RW020 | ADA | MGRM-C26 |
| WT                    | 96                                                   | 98      | 69  | 94       |
| $\Delta V3$           | 28                                                   | 1       | 1   | 21       |
| $\Delta V1/V2$        | 80                                                   | 71      | 70  | 1        |

**Fig. S4.** Neutralizing activity in macaque CE8J plasma can be adsorbed on select gp120 molecules. Macaque CE8J plasma was tested for neutralizing activity against a cross-clade pseudovirus panel after adsorption with WT gp120-, gp120  $\Delta V3$ -, or gp120  $\Delta V1/V2$ -coupled beads or blank control beads. Percent neutralizing activity adsorbed on each construct was calculated using the equation  $[1 - (IC_{50} \text{ blank beads}/IC_{50} \text{ antigen-coated beads})] \times 100$ . Boxes are color coded as follows: gray, 0–45%, yellow, 45–65%; orange, 65–85%; red, 85–100%.

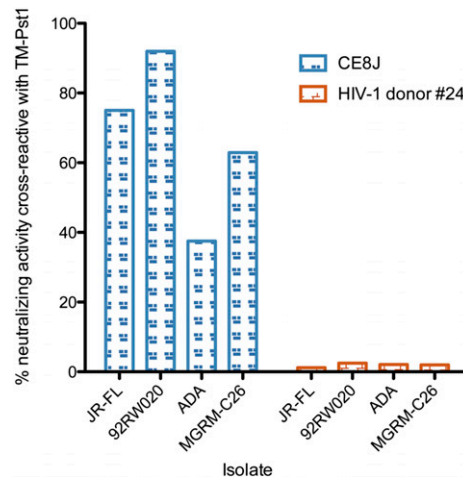

**Fig. S5.** Glycan-specific antibodies mediate broad plasma neutralization in macaque CE8J. Macaque CE8J plasma was tested for neutralizing activity after adsorption with TM-Pst1-coupled beads or blank control beads. A broadly neutralizing HIV-1 serum that has previously been shown to be insensitive to the N332A mutation (donor 24) was included as a negative control (1). Percent neutralizing activity cross-reactive with TM-Pst1 was calculated using the equation  $[1 - (IC_{50} \text{ blank bead-adsorbed plasma}/IC_{50} \text{ Pst1-adsorbed plasma})] \times 100$ .

1. Hubbard SC, Ivatt RJ (1981) Synthesis and processing of asparagine-linked oligosaccharides. *Annu Rev Biochem* 50:555–583.



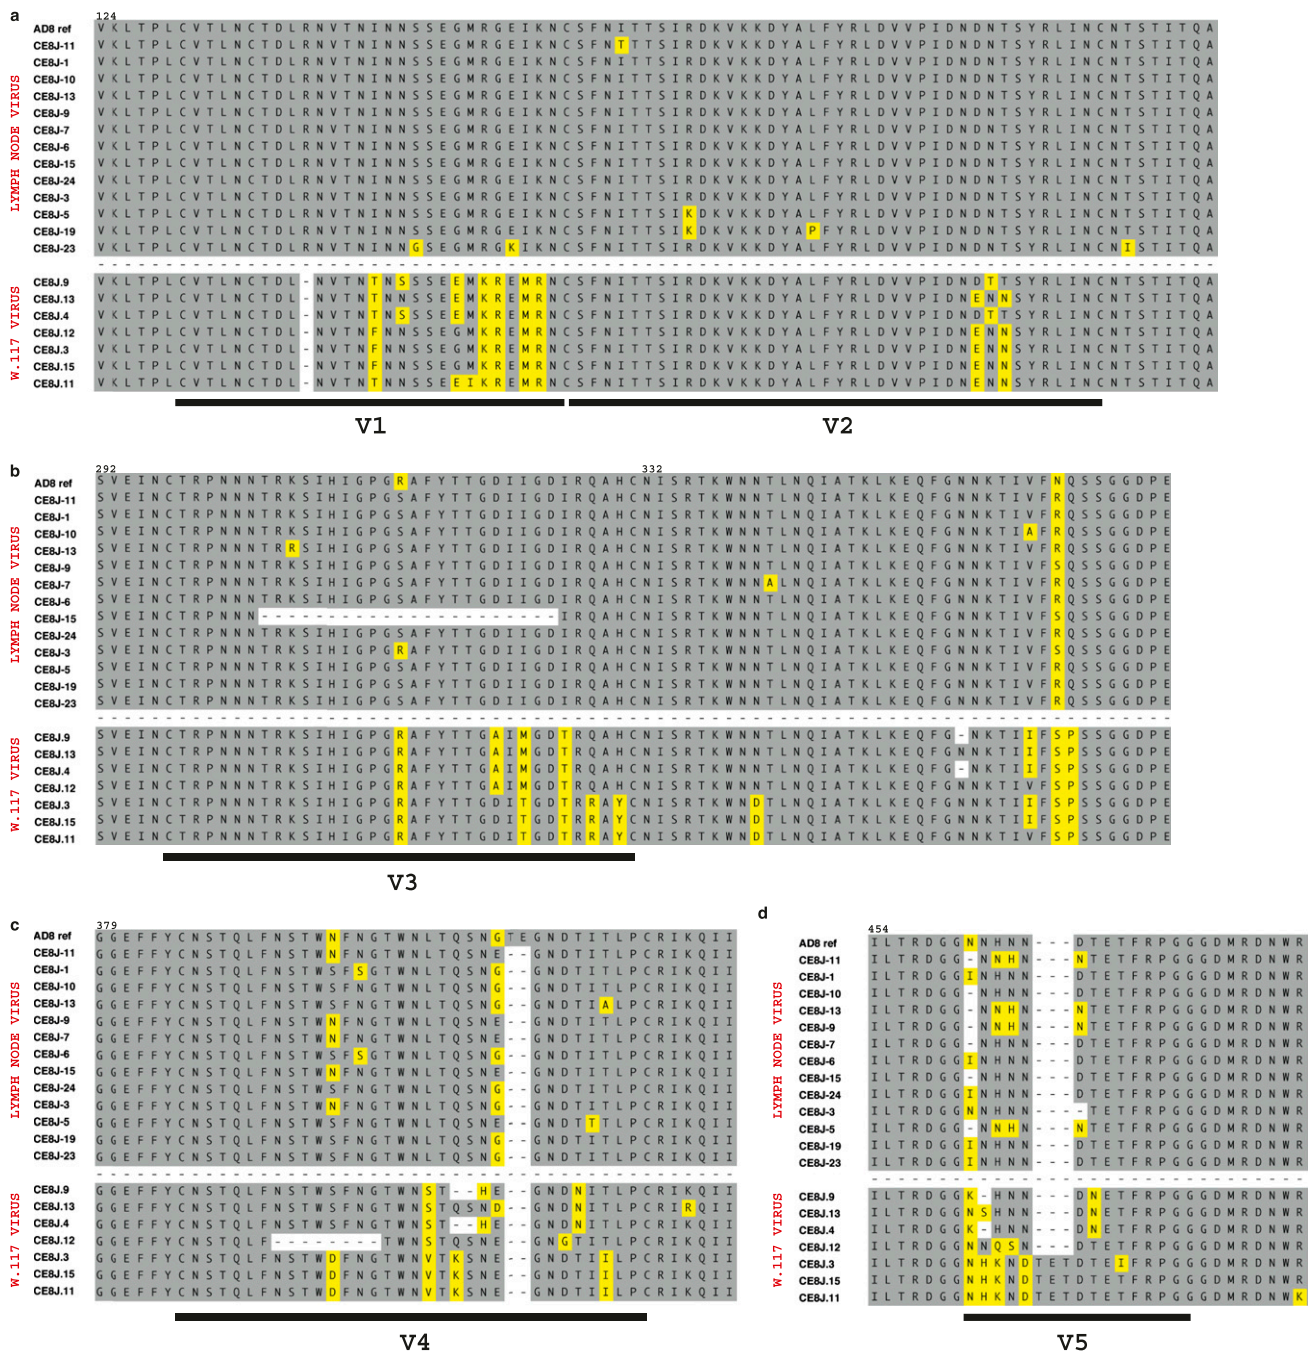

**Fig. S7.** A comparison of variable-region gp120 sequences of the starting SHIV<sub>AD8</sub> lymph node virus inoculum with the virus (W.117) recovered at the time of euthanasia. The deduced amino acid sequences of (A) V1 and V2, (B) V3 and C3, (C) V4, and (D) V5 regions of gp120 were aligned with the HIV-1<sub>AD8</sub> reference sequence at the top. Amino acid changes are highlighted in yellow.

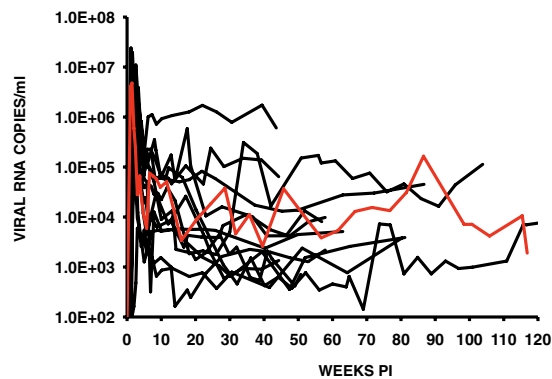

**Fig. S8.** Plasma viremia in the SHIV<sub>AD8</sub>-infected macaques. Plasma viral loads in the 14 SHIV<sub>AD8</sub>-infected macaques were measured over the course of infection. Plasma viral loads of macaque CE8J and the other 13 SHIV-infected macaques are shown in red and black, respectively.

**Table S1.** Development of autologous NABs in 14 SHIV<sub>AD8</sub> infected macaques

| Animal      | Virus inoculum (swarm)             | TZM-bl assay (RC virus) |              |              |              | TZM-bl assay [pseudotyped virus (CK15 Env clone)] |                     |              |                |
|-------------|------------------------------------|-------------------------|--------------|--------------|--------------|---------------------------------------------------|---------------------|--------------|----------------|
|             |                                    | Plasma collection, wk   | Target virus | % Neut, 1:20 | Titer        | Plasma collection, wk                             | Target virus, clone | % Neut, 1:20 | Titer          |
| <b>DA24</b> | CE8J swarm*                        | 22                      | CE8J (Sw)    | <b>26.0</b>  |              | 41                                                | CK15                | <b>65.4</b>  | <1:100         |
| DBX9        | CE8J swarm                         |                         |              |              |              | 28                                                | CK15                |              | <1:100         |
| CZH         | CE8J swarm                         |                         |              |              |              | 29                                                | CK15                |              | <1:100         |
| DBZL        | CE8J swarm                         | 23                      | CE8J (Sw)    | 5.6          |              | 41                                                | CK15                |              | <1:100         |
| CL5E        | CE8J swarm                         | 36                      | CE8J (Sw)    | ND           |              | 49                                                | CK15                |              | <1:100         |
| A3EO50      | CK15 swarm                         |                         |              |              |              | 50                                                | CK15                |              | <1:100         |
| <b>DBJE</b> | CE8J swarm                         | 23                      | CE8J (Sw)    | <b>34.7</b>  |              | 42                                                | CK15                | <b>90.0</b>  | <1:100         |
| DB1A        | CE8J swarm                         |                         |              |              |              | 72                                                | CK15                |              | <1:100         |
| CK5T        | CJ58 swarm                         |                         |              |              |              | 84                                                | CK15                |              | <1:100         |
| A3EO51      | CJ58 swarm                         |                         |              |              |              | 87                                                | CK15                |              | <1:100         |
| CJ7D        | CK15 swarm                         |                         |              |              |              | 86                                                | CK15                |              | <1:100         |
| <b>CJ58</b> | AD8#2 (blood from CJ8B at week 60) | 26                      | AD8#2        | <b>94.2</b>  | <b>1:102</b> |                                                   |                     |              |                |
|             |                                    | 90                      | AD8#2        | <b>29.2</b>  |              | 156                                               | CK15                |              | <1:100         |
| <b>CJ8B</b> | AD8#2                              | 85                      | AD8#2        | <b>97.8</b>  | <b>1:159</b> | 180                                               | CK15                |              | <1:100         |
| <b>CE8J</b> | AD8#2LN                            | 30                      | AD8#2        | <b>25.7</b>  |              | 32                                                | CK15                |              | <b>1:450</b>   |
|             |                                    | 40                      | AD8#2        | <b>93.7</b>  |              | 40                                                | CK15                |              | <b>1:3,282</b> |
|             |                                    | 80                      | AD8#2        | <b>95.2</b>  |              | 80                                                | CK15                |              | <b>1:1,181</b> |

The replication competent SHIVAD8#2-related swarm inocula were prepared as described previously (1). Pseudotyped virus was prepared from an infectious SHIVAD8 molecular clone, carrying an *env* gene present in the SHIVCK15 swarm, as described previously (2). ND, not determined; Neut, neutralization; RC, replication competent. Bold indicates those animals developing detectable autologous anti-HIV-1 NABs.

\*The four different swarm inocula were prepared from the indicated animals (1) at the time of euthanasia from AIDS.

1. Nishimura Y, et al. (2010) Generation of the pathogenic R5-tropic simian/human immunodeficiency virus SHIVAD8 by serial passaging in rhesus macaques. *J Virol* 84:4769–4781.
2. Shingai M, Yoshida T, Martin MA, Strebel K (2011) Some human immunodeficiency virus type 1 Vpu proteins are able to antagonize macaque BST-2 in vitro and in vivo: Vpu-negative simian-human immunodeficiency viruses are attenuated in vivo. *J Virol* 85:9708–9715.

**Table S2. Nine of a cohort of 40 SHIV<sub>AD8</sub> infected macaques develop autologous NABs**

| Animal      | SHIV <sub>AD8</sub> inoculum                           | Assay virus             | Neut assay, wk postinfection | Neut response | % Neut at 1:20 | Notes                          |
|-------------|--------------------------------------------------------|-------------------------|------------------------------|---------------|----------------|--------------------------------|
| <b>DA24</b> | <b>CE8J swarm*</b>                                     | <b>Pseudotyped CK15</b> | <b>41, 52</b>                | <b>+</b>      | <b>65.4</b>    | <b>Undetectable at week 52</b> |
| DBX9        | CE8J swarm                                             | Pseudotyped CK15        | 44                           | –             |                |                                |
| CZH         | CE8J swarm                                             | Pseudotyped CK15        | 44                           | –             |                |                                |
| DBZL        | CE8J swarm                                             | Pseudotyped CK15        | 23, 36, 42, 47, 53, 58       | –             |                |                                |
| CL5E        | CE8J swarm                                             | Pseudotyped CK15        | 51                           | –             |                |                                |
| DB37        | CE8J swarm                                             | Pseudotyped CK15        | 77                           | –             |                |                                |
| DBGL        | CE8J swarm                                             | Pseudotyped CK15        | 62                           | –             |                |                                |
| DB93        | CE8J swarm                                             | Pseudotyped CK15        | 22                           | –             |                |                                |
| <b>DBJE</b> | <b>CE8J swarm</b>                                      | <b>Pseudotyped CK15</b> | <b>42, 47, 53</b>            | <b>+</b>      | <b>90.0</b>    | <b>30% at week 53</b>          |
| DB1A        | CE8J swarm                                             | Pseudotyped CK15        | 84                           | –             |                |                                |
| A3E051      | CL98 swarm                                             | Pseudotyped CK15        | 87                           | –             |                |                                |
| <b>DA55</b> | <b>CL98 swarm</b>                                      | <b>Pseudotyped CK15</b> | <b>57</b>                    | <b>+</b>      | <b>75.5</b>    |                                |
| DB18        | CL98 swarm                                             | Pseudotyped CK15        | 47                           | –             |                |                                |
| CL5B        | CL98 swarm                                             | Pseudotyped CK15        | 29                           | –             |                |                                |
| DB0F        | CL98 swarm                                             | Pseudotyped CK15        | 33                           | –             |                |                                |
| CJ7D        | CK15 swarm                                             | Pseudotyped CK15        | 86                           | –             |                |                                |
| A3E050      | CK15 swarm                                             | Pseudotyped CK15        | 39                           | –             |                |                                |
| DC1W        | CK15 swarm                                             | Pseudotyped CK15        | 58                           | –             |                |                                |
| DC87        | CK15 swarm                                             | Pseudotyped CK15        | 58                           | –             |                |                                |
| DBRL        | CK15 swarm                                             | Pseudotyped CK15        | 48                           | –             |                |                                |
| DC65        | CK15 swarm                                             | Pseudotyped CK15        | 48                           | –             |                |                                |
| A3E046      | CJ58 swarm                                             | Pseudotyped CK15        | 26                           | –             |                |                                |
| DC0L        | Molecular clone<br>(CK15 <i>env</i> gene) <sup>†</sup> | Pseudotyped CK15        | 32, 40                       | –             |                |                                |
| <b>DCF1</b> | <b>Molecular clone<br/>(CK15 <i>env</i> gene)</b>      | <b>Pseudotyped CK15</b> | <b>40</b>                    | <b>+</b>      | <b>79.5</b>    |                                |
| DC8T        | Molecular clone<br>(CK15 <i>env</i> gene)              | Pseudotyped CK15        | 32, 40                       | –             |                |                                |
| DCV9        | Molecular clone<br>(CK15 <i>env</i> gene)              | Pseudotyped CK15        | 32, 40                       | –             |                |                                |
| <b>DC6W</b> | <b>Molecular clone<br/>(CK15 <i>env</i> gene)</b>      | <b>Pseudotyped CK15</b> | <b>40</b>                    | <b>+</b>      | <b>58.5</b>    |                                |
| DC7W        | Molecular clone<br>(CK15 <i>env</i> gene)              | Pseudotyped CK15        | 32, 40                       | –             |                |                                |
| <b>DA70</b> | <b>Molecular clone<br/>(CK15 <i>env</i> gene)</b>      | <b>Pseudotyped CK15</b> | <b>78</b>                    | <b>+</b>      | <b>76.5</b>    |                                |
| DA7F        | Molecular clone<br>(CK15 <i>env</i> gene)              | Pseudotyped CK15        | 78                           | –             |                |                                |
| DA7A        | Molecular clone<br>(CK15 <i>env</i> gene)              | Pseudotyped CK15        | 70                           | –             |                |                                |
| DBFN        | Molecular clone<br>(CK15 <i>env</i> gene)              | Pseudotyped CK15        | 57                           | –             |                |                                |
| DA4R        | Molecular clone<br>(CK15 <i>env</i> gene)              | Pseudotyped CK15        | 78                           | –             |                |                                |
| <b>CJ8B</b> | <b>AD8#2 swarm*</b>                                    | <b>RC AD8#2</b>         | <b>85</b>                    | <b>+</b>      | <b>97.8</b>    |                                |
| CK15        | Week 60 whole<br>blood from CJ8B<br>swarm              | RC AD8#2P BMC           | 46, 67, 82                   | –             |                |                                |
| <b>CJ58</b> | <b>Week 60 whole<br/>blood from CJ8B<br/>swarm</b>     | <b>RC AD8#2P BMC</b>    | <b>26, 86</b>                | <b>+</b>      | <b>93.2</b>    | <b>24% at week 86</b>          |
| CJ3V        | AD8#2P BMC swarm                                       | RC AD8#2P BMC           | 70, 104                      | –             |                |                                |
| CK5G        | AD8#2P BMC swarm                                       | RC AD8#2P BMC           | 30, 50, 84                   | –             |                |                                |
| CE8J        | AD8#2LN swarm                                          | RC AD8#2LN              | 40, 106                      | +             | 93.7           | 91.2% at week 106              |
| CJ35        | AD8#2LN swarm                                          | RC AD8#2LN              | 32, 52, 71                   | –             |                |                                |

Neut, neutralization; RC, replication competent. Bold indicates those animals developing detectable autologous anti-HIV-1 NABs.

\*Swarm inocula were prepared from indicated animals (1) at the time of euthanasia from AIDS.

<sup>†</sup>These replication-competent SHIVAD8#2-related swarm inocula were prepared as described previously (1).

\*An infectious SHIVAD8 molecular clone carrying an *env* gene present in the SHIVCK15 swarm was prepared as described previously (2).

1. Nishimura Y, et al. (2010) Generation of the pathogenic R5-tropic simian/human immunodeficiency virus SHIVAD8 by serial passaging in rhesus macaques. *J Virol* 84:4769–4781.

2. Shingai M, Yoshida T, Martin MA, Strebel K, et al. (2011) Some human immunodeficiency virus type 1 Vpu proteins are able to antagonize macaque BST-2 in vitro and in vivo: Vpu-negative simian-human immunodeficiency viruses are attenuated in vivo. *J Virol* 85:9708–9715.
